# Supplementary material for: Responses of Soil Microbial Communities and Networks to Precipitation Change in a Typical Steppe Ecosystem of the Loess Plateau
Source: MDPI journal article supplement (doi:10.3390/microorganisms10040817), 2022-04-14
Supplement: s1 [file s1]

**Table S1.** The interactions among soil bacterial and fungal OTUs under different treatments.

| Interaction Type |       | 0–10 cm |      |      | 10–20 cm |      |      | 20–30 cm |      |      |
|------------------|-------|---------|------|------|----------|------|------|----------|------|------|
|                  |       | P50     | P100 | P150 | P50      | P100 | P150 | P50      | P100 | P150 |
| Bacterial        | Pos   | 251     | 185  | 241  | 228      | 205  | 237  | 373      | 217  | 235  |
|                  | Neg   | 242     | 192  | 192  | 238      | 198  | 228  | 228      | 216  | 222  |
|                  | Total | 493     | 377  | 433  | 466      | 403  | 465  | 601      | 433  | 457  |
| Fungal           | Pos   | 200     | 185  | 193  | 255      | 170  | 270  | 189      | 186  | 208  |
|                  | Neg   | 164     | 141  | 204  | 75       | 163  | 68   | 190      | 196  | 177  |
|                  | Total | 364     | 326  | 397  | 330      | 333  | 338  | 379      | 382  | 385  |
